# Supplementary material for: The Potential Antinociceptive Effect and Mechanism of Cannabis sativa L. Extract on Paclitaxel-Induced Neuropathic Pain in Rats Uncovered by Multi-Omics Analysis
Source: MDPI journal article supplement (doi:10.3390/molecules29091958), 2024-04-25
Supplement: s1 [file s1]

**Figure S1.** Base peak intensity chromatogram (BPI) of *Cannabis sativa* L. extract (JG) for UPLC-QTOF/MS analysis (A) positive ion mode, (B) Negative ion mode.

**Figure S2.** Base peak ion (BPI) chromatogram of serum sample for metabolome analysis

**Table S1.** Statistics and quality control of transcriptome sequencing data from spinal cord

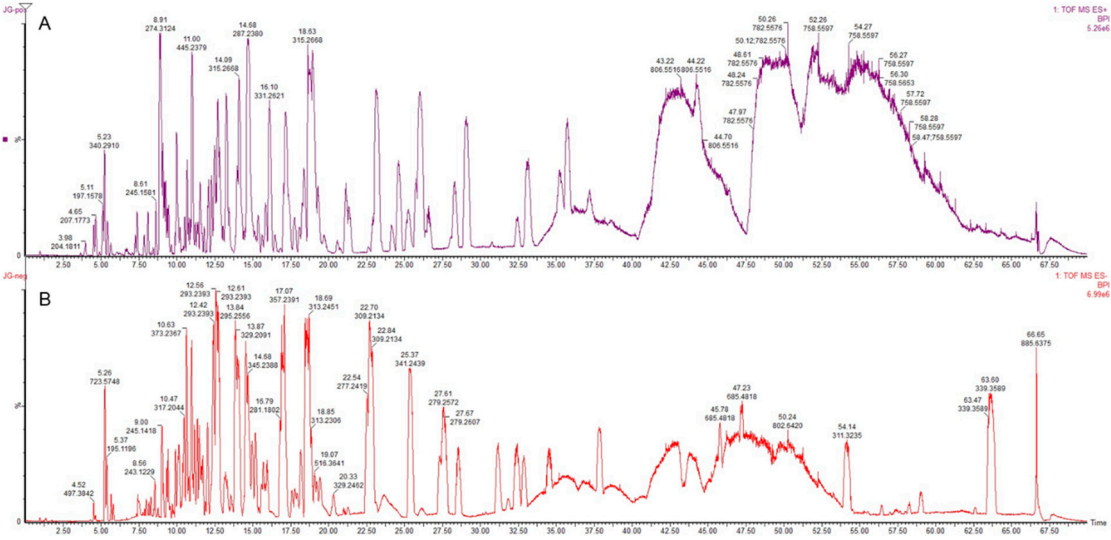

**Figure S1.** Base peak intensity chromatogram (BPI) of *Cannabis sativa* L. extract (JG) for UPLC-QTOF/MS analysis (A) positive ion mode, (B) Negative ion mode.

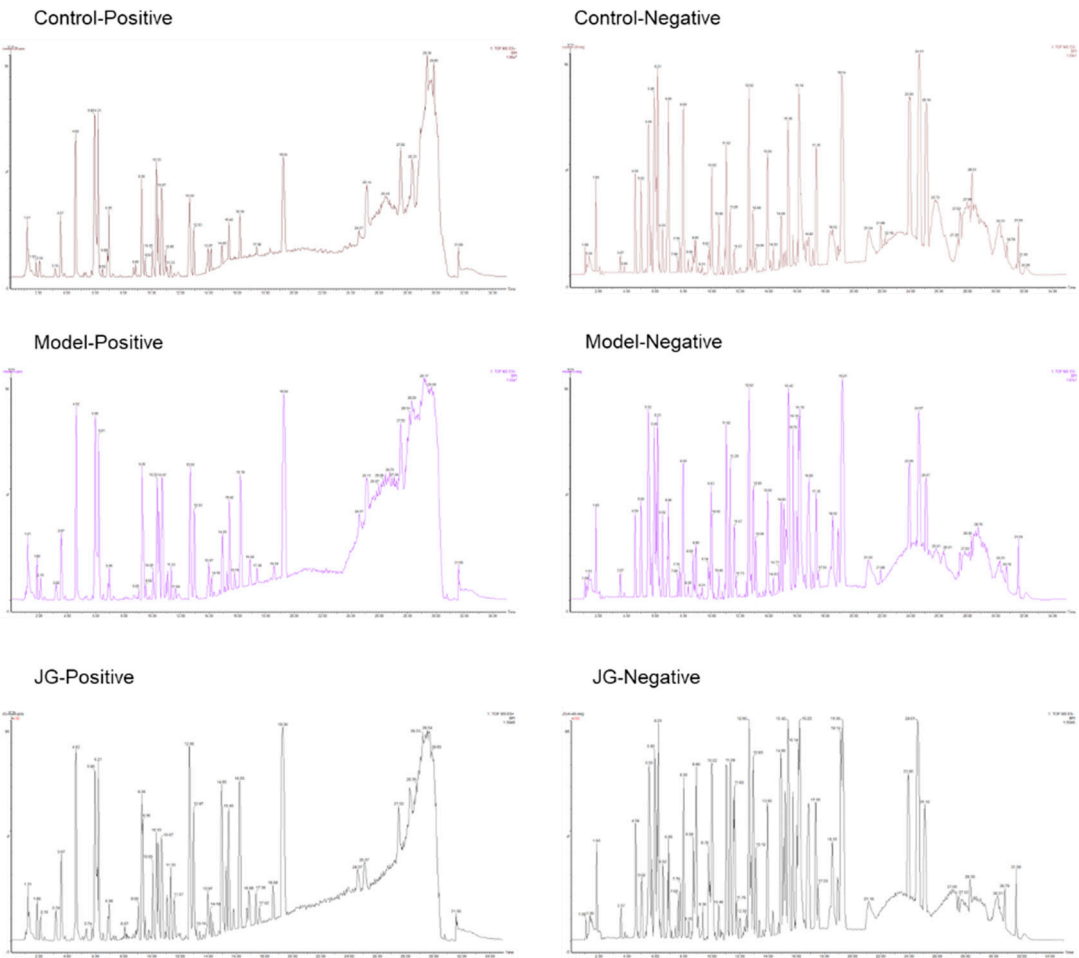

**Figure S2.** Base peak ion (BPI) chromatogram of serum sample for metabolome Analysis

**Table S1.** Statistics and quality control of transcriptome sequencing data from spinal cord

| Groups  | Sample | Raw Reads/million | Clean Reads/million | Q20 (%) | Q30 (%) | GC (%) |
|---------|--------|-------------------|---------------------|---------|---------|--------|
| Control | C-1    | 47.53             | 47.14               | 98.29   | 95.02   | 48.2   |
|         | C-2    | 45.71             | 45.29               | 98.15   | 94.63   | 47.7   |
|         | C-3    | 50.46             | 49.98               | 98.25   | 94.83   | 47.65  |
|         | C-4    | 47.51             | 47.19               | 98.16   | 94.7    | 47.46  |
| Model   | M-1    | 51.92             | 51.51               | 98.19   | 94.74   | 47.53  |
|         | M-2    | 53.33             | 52.85               | 98.19   | 94.76   | 47.7   |
|         | M-3    | 43.85             | 43.45               | 98.29   | 95.05   | 47.88  |
|         | M-4    | 55.57             | 55.11               | 98.2    | 94.75   | 48.06  |
| JG      | JG-1   | 49.83             | 49.32               | 98.21   | 94.79   | 47.79  |
|         | JG-2   | 49.41             | 48.97               | 98.2    | 94.75   | 47.28  |
|         | JG-3   | 54.57             | 54.04               | 98.27   | 94.97   | 47.57  |
|         | JG-4   | 52.13             | 51.57               | 98.22   | 94.8    | 47.91  |
